# Supplementary material for: The Repellent Capacity against Sitophilus zeamais (Coleoptera: Curculionidae) and In Vitro Inhibition of the Acetylcholinesterase Enzyme of 11 Essential Oils from Six Plants of the Caribbean Region of Colombia
Source: MDPI journal article supplement (doi:10.3390/molecules29081753), 2024-04-12
Supplement: s1 [file s1]

# **The Repellent Capacity against *Sitophilus zeamais* (Coleoptera: Curculionidae) and In Vitro Inhibition of the Acetylcholinesterase Enzyme of 11 Essential Oils from Six Plants of the Caribbean Region of Colombia**

Amner Muñoz-Acevedo <sup>1,\*</sup>, María C. González <sup>1</sup>, Jesús E. Alonso <sup>2</sup> and Karen C. Flórez <sup>2</sup>

<sup>1</sup> Department of Chemistry and Biology; Universidad del Norte, Puerto Colombia, Colombia; am-  
nerm@uninorte.edu.co, mgonzalesd@uninorte.edu.co

<sup>2</sup> Department of Mathematics and Statistics; Universidad del Norte, Puerto Colombia, Colombia; jca-  
brera@uninorte.edu.co, lozanok@uninorte.edu.co

\* Correspondence: amnerm@uninorte.edu.co; Tel.: +57 605 3509509 ext. 3046

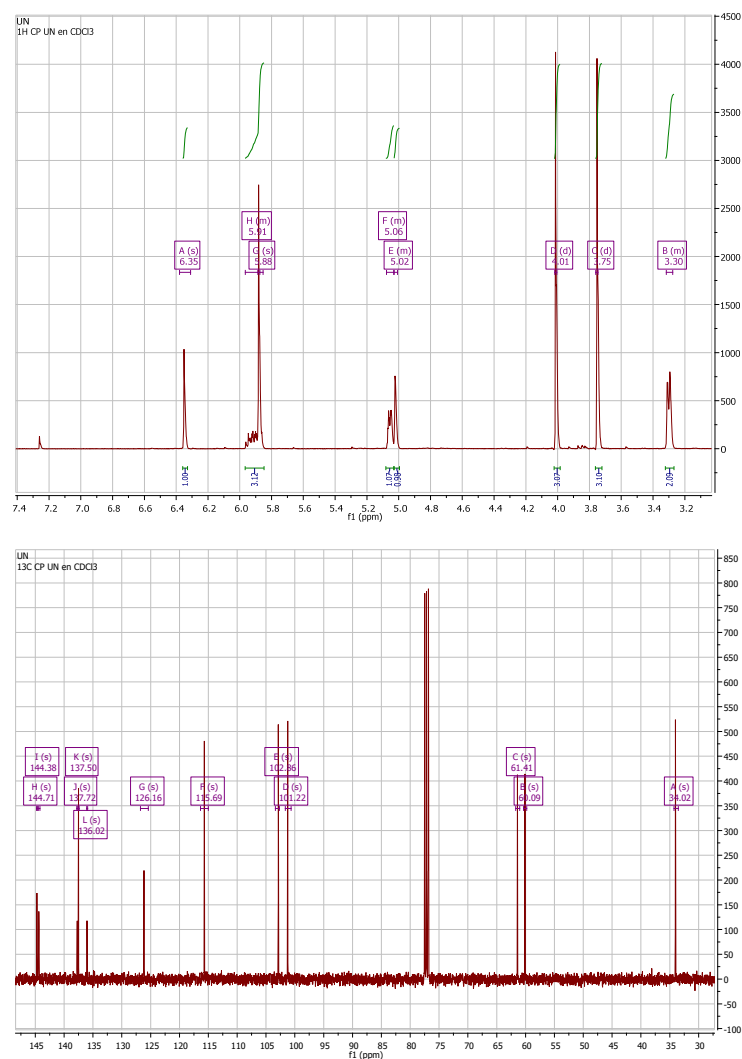

**Figure S1.**  $^1\text{H}$ - $^{13}\text{C}$ -NMR spectra of the EO from *P. holtonii* (1b\*) leaves.

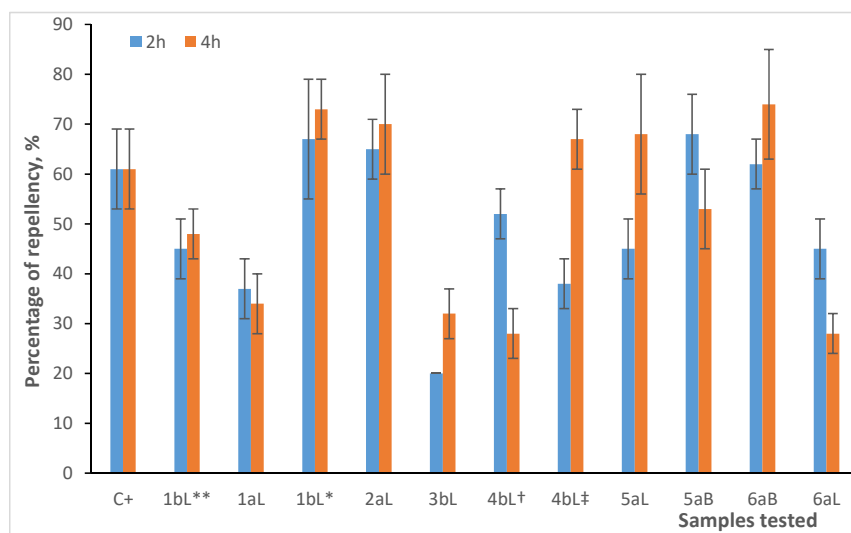

**Figure S2.** Repellent effect (at 2 h and 4 h) of 11 EOs and chlorpyrifos (C<sup>+</sup>) against *S. zeamais*.

Two-way fixed-effect model (S1) related to ANOVA with two variables (exposure time and EO type)

$$Y_{ijk} = \mu + \alpha_i + \tau_j + (\alpha\tau)_{ij} + \varepsilon_{ijk}, \quad (\text{S1})$$

where  $i = 1, 2, \dots, 12$ ;  $j = 1, 2$ ;  $k = 1, 2, \dots$ ,  $n_{ij}$ ;  $Y_{ijk}$  is the degree of repellency observed,  $\alpha_i$  is the effect for the  $i$ -th treatment (EO type);  $\tau_j$  is the effect for the  $j$ -th level of the exposure time factor;  $(\alpha\tau)_{ij}$  represents the interaction between the two factors; and,  $\varepsilon_{ijk}$  corresponds to the random error associated with each response which fits a normal distribution (with zero as an average value and a constant standard deviation).

**Table S1.** Two-way ANOVA for the degree of repellency data.

| Source of variation | SS         | DF  | MS       | F value | Sign. |
|---------------------|------------|-----|----------|---------|-------|
| EO type             | 20674.436  | 11  | 1879.494 | 33.349  | 0.000 |
| Time                | 182.932    | 1   | 182.932  | 3.246   | 0.075 |
| Interaction         | 5907.309   | 11  | 537.028  | 9.529   | 0.000 |
| Error               | 5804.861   | 103 | 56.358   |         |       |
| Total               | 399800.000 | 127 |          |         |       |

SS—sums of square, DF—degrees of freedom, MS—mean square, <sup>a</sup>R<sup>2</sup>: 0.827 (R<sup>2</sup><sub>adj</sub>: 0.788).

One-way ANOVA combined with straight line regression (for a complete interaction) model (S2).

$$Y_{ij} = \mu + \alpha_i + \beta_i t_{ij} + \varepsilon_{ij}, \quad (S2)$$

where  $i=1, 2, \dots, 12$ ;  $j=1, 2, \dots, n_i$ ;  $\alpha_i$  is the effect of the  $i$ -th treatment (type of EO);  $t$  is the exposure time considered as a quantitative variable among 2–4 h,  $\beta_i$  is the slope which can depend on the level  $i$  of the first factor; and,  $\varepsilon_{ij}$  corresponds to the error associated with each response which is adjusted to a normal distribution.

**Table S2.** One-way ANOVA combined with simple linear regression for the degree of repellency data.

| Source of variation        | SS         | DF  | MS      | F value | Sign. |
|----------------------------|------------|-----|---------|---------|-------|
| EO type                    | 5852.636   | 11  | 532.058 | 9.441   | 0.000 |
| Exposure time<br>(EO type) | 6000.335   | 12  | 500.028 | 8.872   | 0.000 |
| Error                      | 5804.861   | 103 | 56.358  |         |       |
| Total                      | 399800.000 | 127 |         |         |       |

SS—sums of square, DF—degrees of freedom, MS—mean square, <sup>a</sup>R<sup>2</sup>: 0.827 (R<sup>2</sup><sub>adj</sub>: 0.788).

**Table S3.** Significant cases (EO type) in the ANOVA model (2) with exposure time as a covariate.

| Parameter     | B       | SE     | t      | Sig.  | Parameter    | B       | SE    | t      | Sig.  |
|---------------|---------|--------|--------|-------|--------------|---------|-------|--------|-------|
| Interception  | 60.139  | 4.150  | 14.492 | 0.000 |              |         |       |        |       |
| $\alpha_1$    | -17.639 | 9.363  | -1.884 | 0.062 | $\beta_1$    | 1.250   | 2.654 | 0.471  | 0.639 |
| $\alpha_2$    | -20.806 | 10.180 | -2.044 | 0.044 | $\beta_2$    | -1.333  | 2.741 | -0.486 | 0.628 |
| $\alpha_3$    | -0.139  | 10.543 | -0.013 | 0.990 | $\beta_3$    | 3.333   | 3.065 | 1.088  | 0.279 |
| $\alpha_4$    | -0.139  | 9.211  | -0.015 | 0.988 | $\beta_4$    | 2.500   | 2.518 | 0.993  | 0.323 |
| $\alpha_5$    | -52.639 | 9.363  | -5.622 | 0.000 | $\beta_5$    | 6.250   | 2.654 | 2.355  | 0.020 |
| $\alpha_6$    | 17.361  | 9.363  | 1.854  | 0.067 | $\beta_6$    | -12.500 | 2.654 | -4.710 | 0.000 |
| $\alpha_7$    | -51.806 | 9.611  | -5.390 | 0.000 | $\beta_7$    | 14.583  | 2.867 | 5.087  | 0.000 |
| $\alpha_8$    | -38.472 | 9.109  | -4.224 | 0.000 | $\beta_8$    | 11.667  | 2.423 | 4.815  | 0.000 |
| $\alpha_9$    | 22.528  | 8.468  | 2.660  | 0.009 | $\beta_9$    | -7.333  | 2.273 | -3.226 | 0.002 |
| $\alpha_{10}$ | -9.139  | 9.211  | -0.992 | 0.323 | $\beta_{10}$ | 5.750   | 2.518 | 2.284  | 0.024 |
| $\alpha_{11}$ | 1.861   | 9.211  | 0.202  | 0.840 | $\beta_{11}$ | -8.500  | 2.518 | -3.376 | 0.001 |
| $\alpha_{12}$ | 0       |        |        |       | $\beta_{12}$ | 0.243   | 1.290 | 0.188  | 0.851 |

B—Estimated value of parameter, SE—Standard error, t—t value.

**Table S4.** Inhibitory effects (IC<sub>50</sub> and %I (at 1 µg/mL)) on AChE of the 11 EOs and the control substance (chlorpyrifos).

| Code              | Sample evaluated                | Inhibitory effects on AChE <sup>†</sup> |                 |
|-------------------|---------------------------------|-----------------------------------------|-----------------|
|                   |                                 | IC <sub>50</sub> (µg/mL)                | I% (at 1 µg/mL) |
| C <sup>+</sup>    | Chlorpyrifos                    | 0.59 ± 0.04                             | 59 ± 3          |
| 1bL <sup>**</sup> | <i>P. holtonii</i> <sup>*</sup> | 32 ± 2                                  | NR              |
| 1aL               | <i>P. holtonii</i>              | 38 ± 2                                  | NR              |
| 1bL <sup>*</sup>  | <i>P. holtonii</i>              | 28 ± 2                                  | NR              |
| 2aL               | <i>Pep. pellucida</i>           | 14 ± 1                                  | NR              |
| 3bL               | <i>P. haughtii</i>              | 40 ± 3                                  | NR              |
| 4bL <sup>†</sup>  | <i>P. reticulatum</i>           | 21 ± 1                                  | NR              |
| 4bL <sup>‡</sup>  | <i>P. reticulatum</i>           | 25 ± 2                                  | NR              |
| 5aL               | <i>B. graveolens</i>            | 16 ± 1                                  | NR              |
| 5aB               | <i>B. graveolens</i>            | 18 ± 1                                  | NR              |
| 6aB               | <i>B. simaruba</i>              | 7.7 ± 0.9                               | NR              |
| 6aL               | <i>B. simaruba</i>              | 4.6 ± 0.3                               | 10.4 ± 0.5      |

L—Leaves, B—Bark, a—Atlántico, b—Sucre, \* Location I, \*\* Location II, <sup>†</sup> Fresh, <sup>‡</sup> Dried, <sup>†</sup> Values reported as  $\bar{x} \pm s$  according to the replicates. Codes for plants are numbers: different types of species (1—*P. holtonii*, 2—*Pep. pellucida*, 3—*P. haughtii*, 4—*P. reticulatum*, 5—*B. graveolens*, 6—*B. simaruba*).
